# Supplementary material for: Highly efficient aerobic oxidation of benzyl alcohol to benzaldehyde over Mn-Ni-O catalysts
Source: Research Square preprint supplement (doi:10.21203/rs.3.rs-7862383/v1), 2025-11-19
Supplement: Supplementary file 1 [file c997c35556fa7d04e92806bd.docx]

**Highly efficient aerobic oxidation of benzyl alcohol to benzaldehyde over Mn-Ni-O catalysts**

Fan Xu, Wenjie Yang, Xuemei Jing, Chuchu, Zhang, Guojun Shi*

School of Chemistry and Chemical Engineering, Yangzhou University, Yangzhou 225002, Jiangsu Province, the People’s Republic of China

Supplementary materials

1. Characterization of catalysts

1.1. Inductively coupled plasma emission spectroscopy

Element analysis of catalysts was conducted using PerkinElmer Optima 7300 DV Inductively Coupled Plasma Optical Emission Spectrometer (ICP-OES). Prior to testing, the test samples (approximately 5 mg) were dissolved in a mixture of concentrated nitric acid and hydrofluoric acid. The resulting solution was then diluted with a 1% dilute nitric acid solution to bring the concentration of the measured elements to between 1 and 10 ppm. During testing, qualitative analysis was performed using characteristic spectral lines, and quantitative analysis was carried out using the standard curve method.

1.2. X-ray diffraction analysis

Using a Be multi-crystal X-ray diffractometer (XRD) for crystal structure and phase analysis of the catalyst. Before the test, the sample was ground finely and sieved through a 3-mesh sieve. A small amount of the sample was placed on the sample stage and flattened with a cover glass. During the test, Cu Kα-ray was used, with tube voltage and tube current set at 40 kV and, respectively. The sample measurement angle range was 1, with a step size of 0. The results were analyzed using Jade 6 software and compared with XRD standard cards.

1.3. Low-temperature nitrogen adsorption-desorption

On the ASAP 2020 HD88 multi-purpose adsorption instrument from Micromeritics in the United States, the specific surface area, pore volume, and average pore size of the sample were measured. The adsorption temperature was -196°C. The specific surface area was calculated using the Brunauer Emmett Teller (BET) isotherm equation, while the pore size distribution and pore volume were calculated using the Barrett-Joyner-Halenda (BJH) equation. The sample was degassed in high-purity N2 at 200°C for 4 hours before testing.

1.4. Scanning electron microscope analysis

Using a Zeiss-Supra type field emission scanning electron microscope (SEM) to observe the surface morphology of supported catalysts. Before testing, the sample to be tested is placed flat on a carrier stage with conductive adhesive. The catalyst surface is sprayed with gold in an inert atmosphere for approximately 35 s. The images are taken under a voltage of 5 kV to observe the surface morphology of the sample.

1.5. Transmission electron microscope analysis

Morphologies and grain sizes of catalyst were analyzed via a Tecnai 12 transmission electron microscope produced by a Dutch company, with a maximum magnification of 650,000 times, a point resolution of nm, and a line resolution. Due to the limitations of the high voltage of the electron microscope and the sample preparation equipment, transmission electrons can generally only penetrate thin layer samples of several tens of nanometers in thickness. Before testing, the catalyst is finely ground. A small amount of powder is dispersed in anhydrous ethanol and sonicated for 10 minutes to disperse it. During testing, a small amount of liquid is taken with a pipette, dropped onto a copper grid, dried under an infrared lamp, and then observed in the sample chamber. Adjust the accelerating voltage and magnification according to testing requirements.

1.6. High-resolution transmission electron microscopy analysis.

High-resolution electron microscopy uses the Tecnai G2 F30 S-TWIN field emission transmission electron microscope from FEI Company in the United States, with an accelerating voltage range of 50–300 kV, a maximum HRTEM magnification of 1 million times, a maximum STEM magnification of 3 million times, a point resolution of 0.20 nm, line resolution of 0.10 nm, and an information resolution of 0.14 nm.

1.7. X-Ray Photoelectron Spectroscopy Analysis

Using the ESCALAB 250Xi X-ray photoelectron spectrometer produced by the American company Thermo Scientific. Before the test, the sample was attached to the sample stage with double-sided tape and dried. During the test, a target was used as the excitation source, with a target acceleration voltage of, a working current of, an analysis chamber vacuum of approximately , and a testing depth of approximately 3 nm. After the test, data processing was carried out using the Avantage software.

1. Added results

**Figure S1** Effect of calcination temperature on the catalytic oxidation activity of benzyl alcohol over Mn6Ni4Ox.

**Figure S2** Effect of reaction temperature on the catalytic oxidation activity of benzyl alcohol over Mn6Ni4Ox catalyst.

**Table S1** The performances of the covalently anchored TEMPO in selective oxidation of benzyl alcohol to benzaldehyde reported in publications in comparison with the present work

| Entry | Catalyst | Reaction conditions | Conv.% | Sel.%(BAC) | References |
| --- | --- | --- | --- | --- | --- |
| 1 | Pd/PVDF membrane | 80 ℃, H2O2, 1 atm | 30 | 80 | J. Wang et al, Mol. Catal. 564 (2024) 114303 |
| 2 | Pd/PVDF-PMMA | 80 ℃, H2O2, 1 atm | 25 | 80 | X. Shi, et al, Colloid Surf. A 673 (2023) 131822 |
| 3 | Silica-gel-TEMPO-NOx | Room temperature, air, 1 atm | 99.9 | 99.9 | H. Zhang, et al, Chin. J. Catal. 34 (2013) 1848–1854 |
| 4 | TEMPO-ether-MCM-41 | Room temperature, O2, 1 atm | 35.0 | 99.9 | D. Brunel, et al, Appl. Catal., A 213 (2001) 73–82 |
| 5 | SBA-15-supported TEMPO | 50 ℃, O2, 1 atm | 100 | 99.8 | K. Babak, et al, Angew. Chem. 119 (2007) 7348–7351 |
| 6 | 4-Amino-TEMPO-immobilized | Room temperature, air, 1 atm | 48.0 | 94.0 | I. Tomoki, et al, Polymers (2022) 14–5123 |
| 7 | SS-TEMPO/SiO2 | 40 ℃, O2, 1 bar | 99.0 | 99.0 | G. Michelle, et al, Catal. Today 117 (2006) 114–119 |
| 8 | 4-Methoxy-TEMPO | 0 ℃, NaOCl, 1atm | 99.9 | 99.9 | F. Pedro, et al, Green Chem. 6 (2004) 310–312 |
| 9 | TEMPO/CPGMA | 25 ℃, O2, 1atm | 90.0 | 100 | Y. Yu, et al, Chin. J. Catal. 34 (2013) 1776–1786 |
| 10 | TEMPO/HBr | 40 ℃, H2O2, 1atm | 92.0 | 97.0 | J. Nan, et al, Tetrahedron Lett. 46 (2005) 3323–3326 |
| 11 | MWNTs-TEMPO | 40 ℃, hypochlorite, 1atm | 100 | 99.0 | Y. Wang, et al, RSC Adv. 2 (2012) 7693–7698 |
| 12 | Ni-Mn-O/CNTS | 100 ℃, O2,1atm | 33 | 100 | M. Yang et al, J. Mol. Catal. A 380 (2013) 61– 69 |
| 13 | Ni-Mn-O | 100 ℃, O2,1atm | 89 | 99.0 | Q. Tang, et al, Appl. Catal. A 403 (2011) 136–141 |
| 14 | SiO2-TEMPO | 70 ℃, O2,1atm | 83.1 | 100 | This work |

**Table S2** Electronic states of Ni and Mn elements of the fresh and spent Mn6Ni4Ox catalysts.

| Catalyst | Mn3+/(Mn2++Mn3++Mn4+) (%) | Ni2+/(Ni2++Ni3+) (%) | Oads/(Olat+Oads) (%) |
| --- | --- | --- | --- |
| Mn6Ni4Ox  Mn6Ni4Ox-R6 | 65.3  66.8 | 64.8  66.1 | 27.6  20.6 |

**Table S3** Concentration of Mn and Ni ions in the reaction solution resulted from the benzyl alcohol oxidation over the catalyst Mn6Ni4Ox determined via ICP-OES

| Catalyst | Concentration (ppm) |
| --- | --- |
| Mn  Ni | 0.70  0.91 |

Reaction conditions: BAL (2 mmol), CB (2 mmol), Mn6Ni4Ox (0.3 g), Toluene (10 mL), 60 °C, 4 h, 1 atm. BAL: Benzyl alcohol, CB: Chlorobenzene, BAH: Benzaldehyde.
